# Supplementary material for: Determinants and Experiences of Financial Toxicity Among Oral Cancer Patients in a Public Hospital in India: A Mixed Methods Study
Source: Research Square preprint supplement (doi:10.21203/rs.3.rs-6487155/v1), 2025-04-22
Supplement: Supplementary file 1 [file 5b3368b8532e545b4bd7abdb.docx]

**Supplementary Table 1: Characteristics of patients who underwent in-depth interviews**

| **Participant code** | **Age** | **Gender** | **Educational status** | **Site of disease** | **Grade** | **Stage of disease** |
| --- | --- | --- | --- | --- | --- | --- |
| P1 | 52 | Male | High school | Buccal mucosa | Moderately differentiated | Stage IV |
| P2 | 65 | Male | Graduate | Oropharynx | Poorly differentiated | Stage IV |
| P3 | 60 | Male | Illiterate | Oropharynx | Moderately differentiated | Stage IV |
| P4 | 54 | Female | Illiterate | Tongue | Moderately differentiated | Stage IV |
| P5 | 41 | Male | High school | Base of tongue | Moderately differentiated | Stage IV |
| P6 | 50 | Female | High school | Buccal mucosa | Well  differentiated | Stage IV |
| P7 | 63 | Female | Middle school | Oropharynx | Poorly differentiated | Stage IV |
| P8 | 53 | Male | High school | Soft palate | Moderately differentiated | Stage III |
| P9 | 65 | Male | Illiterate | Buccal mucosa | Well  differentiated | Stage II |
| P10 | 35 | Male | Illiterate | Buccal mucosa | Well  differentiated | Stage IV |
| P11 | 40 | Male | High school | Buccal mucosa | Well  differentiated | Stage IV |
